# Supplementary material for: Challenges to Cannabis sativa Production from Pathogens and Microbes—The Role of Molecular Diagnostics and Bioinformatics
Source: MDPI journal article supplement (doi:10.3390/ijms25010014), 2023-12-19
Supplement: s1 [file s1]

**Supplementary Table S1.** Universal degenerate primers and species-specific primers to a range of viruses and virus groups that were tested in this study on cannabis leaf tissues.

|             |                                |                                |                  |                                                                                                               |
|-------------|--------------------------------|--------------------------------|------------------|---------------------------------------------------------------------------------------------------------------|
| 357-358     | Tob-Uni 1                      | ATTTAAGTGGASGGAAA<br>AVCACT    | 10 min @<br>95°C | 60s @ 95°C<br>60s @ 50°C<br>60s @ 72°C                                                                        |
|             | Tob-Uni 2                      | GTYGTTGAGTTCATGGA              |                  |                                                                                                               |
| 722-723     | Nepo univ A-F<br>Nepo univ A-R | ACDTCWGARGGITAYCC              | 10 min @<br>95°C | 60s @ 94°C<br>60s @ 50°C<br>60s @ 72°C                                                                        |
|             |                                | RATDCCYACYTGRCWIG<br>GCA       |                  |                                                                                                               |
| 891-892     | TuRSV RNA1 Sp1F                | TCGCAGGCTAGAAGAGT              | 10 min @<br>95°C | 60s @ 95°C<br>60s @ 50°C<br>60s @ 72°C                                                                        |
|             | TurSV RNA1 Sp2R                | GGCCCTAAGTGTTCTCTG             |                  |                                                                                                               |
| 783-784     | Ilar1F5                        | GCNCGWTGYGGDAARW<br>CNAC       | 10 min @<br>95°C | 30s @ 94°C<br>30s @ 48°C<br>30s @ 72°C<br>for 40 cycles                                                       |
|             | Ilar1R7                        | AMDGGWAYYTGYTYNG<br>TRTCACC    |                  |                                                                                                               |
| 749- 750    | Cuc CPTALL-5 F                 | YASYTTTDRGGTTCAATT<br>CC       | 10 min @<br>95°C | 60s @ 94°C<br>60s @ 48°C<br>60s @ 72°C<br>for 40 cycles                                                       |
|             | Cuc CPTALL-3 R                 | GACTGACCATTTTAGCC<br>G         |                  |                                                                                                               |
| 770-771-772 | TobN-Univ-up3                  | GGCGYTGCARACIATHG<br>TITAYCA   | 10 min @<br>95°C | 20s @ 94°C<br>15s @ 51°C<br>5s @72°C<br>for 2 cycles<br>20s @ 94°C<br>15s @ 61°C<br>5s @72°C<br>for 26 cycles |
|             | TobN-Univ-do4                  | GTRTTICCIATRAAIGTIG<br>TIACRTC |                  |                                                                                                               |
|             | TobN-Univ-do4G                 | GCCGATRAAGGTGGTGA<br>CRTC      |                  |                                                                                                               |
| 846-847     | AMV- F<br>AMV-coat-R           | GTGGTGGGAAAGCTGGT<br>AAA       | 10 min @<br>95°C | 45s @ 94°C<br>45s @ 50°C<br>45s @ 72°C<br>for 35 cycles                                                       |
|             |                                | CACCCAGTGGAGGTCAG<br>CATT      |                  |                                                                                                               |
| 628-629     | Potyvirus univ – Nib2F         | GTITGYGTIGAYGAYTTY<br>AAYAA    | 10 min @<br>95°C | 45s @ 94°C<br>45s @ 52°C<br>45s @ 72°C<br>for 36 cycles                                                       |
|             | Potyvirus univ – Nib3R         | TCIACIACIGTIGAIGGYT<br>GNCC    |                  |                                                                                                               |

**Supplementary Table S2.** Quality characteristics of RNA isolated from seven genotypes of cannabis.

| <b>Sample ID</b> | <b>ng / <math>\mu</math>L</b> | <b>260/280</b> | <b>260/230</b> |
|------------------|-------------------------------|----------------|----------------|
| PDH              | 199.23                        | 1.98           | 1.55           |
| PD               | 184.92                        | 2.07           | 1.91           |
| Mac-1            | 82.07                         | 2.10           | 2.20           |
| PK               | 232.67                        | 2.09           | 1.98           |
| BC               | 115.54                        | 2.07           | 1.02           |
| CBD              | 77.42                         | 2.14           | 2.15           |
| G54-2            | 253.73                        | 2.08           | 2.23           |
